# Supplementary material
Source: publisher site journal article supplement (https://www.dovepress.com/article/418697)
Supplement: Supplementary file 1 [file get_supplementary_file.php]

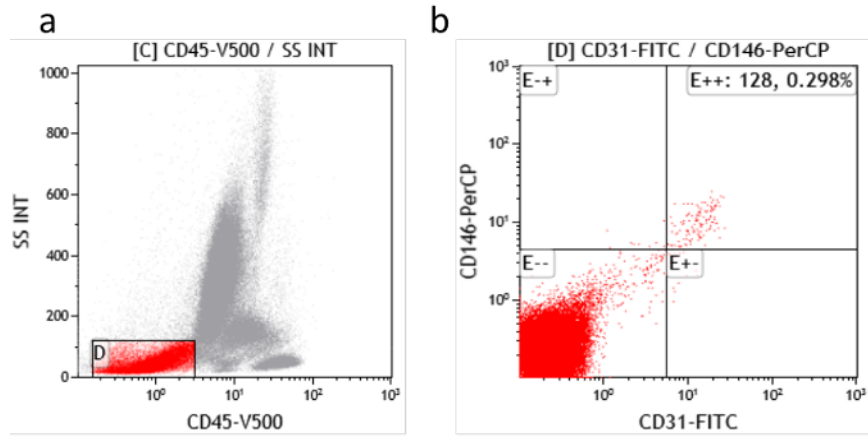

**Supplement Figure 1.** CEC Counting Method by Flow Cytometry. (a) Side scatter (SS) plot of CD45<sup>-</sup> cells. (b) CECs were introduced to display the two progenitor markers (CD31 and CD146) in another 2D plot.
